# Supplementary material
Source: publisher figshare collection journal article supplement (https://sage.figshare.com/ndownloader/files/14241173)
Supplement: Supplementary file 1 [file 14241173]

Drum Set

6/8

Drum set notation on a five-line staff. The notation consists of five measures. The first measure has a quarter note on the bottom line with a triplet of eighth notes (marked with 'x') above it. The second measure has a quarter note on the bottom line with a triplet of eighth notes (marked with 'x') above it. The third measure has a quarter note on the bottom line with a triplet of eighth notes (marked with 'x') above it, and a quarter note on the second line. The fourth measure has a quarter note on the bottom line with a triplet of eighth notes (marked with 'x') above it, and a quarter note on the second line. The fifth measure has a quarter note on the bottom line with a triplet of eighth notes (marked with 'x') above it, and a quarter note on the second line. The piece ends with a double bar line.
