# Supplementary material
Source: publisher figshare collection journal article supplement (https://sage.figshare.com/ndownloader/files/14241173)
Supplement: Supplementary file 2 [file 14241173]

Drum Set

6/8

The drum set notation is written on a single staff with a 6/8 time signature. The notation consists of a series of eighth notes and rests, with 'x' marks indicating specific drum sounds. The pattern is as follows:   
Measure 1: Eighth rest, eighth note (x), eighth note (x).   
Measure 2: Eighth note (x), eighth note (x).   
Measure 3: Eighth note (x), eighth note (x).   
Measure 4: Eighth note (x), eighth note (x).   
Measure 5: Eighth note (x), eighth note (x).   
Measure 6: Eighth note (x), eighth note (x).   
Measure 7: Eighth note (x), eighth note (x).   
Measure 8: Eighth note (x), eighth note (x).   
The notation ends with a double bar line.
