# Supplementary material
Source: publisher figshare collection journal article supplement (https://sage.figshare.com/ndownloader/files/14241173)
Supplement: Supplementary file 3 [file 14241173]

Drum Set

6/8

The drum set notation is written on a single staff in 6/8 time. It consists of five measures. The first measure contains an eighth note, three eighth rests, and a quarter note with an 'x' above it. The second measure contains a quarter note, a quarter note with an 'x' above it, and a quarter rest. The third measure contains a quarter note, a quarter note with an 'x' above it, and a quarter rest. The fourth measure contains a quarter note, a quarter note with an 'x' above it, and a quarter rest. The fifth measure contains a quarter note, a quarter note with an 'x' above it, and a quarter rest. The notation ends with a double bar line.
