# Supplementary material
Source: publisher figshare collection journal article supplement (https://sage.figshare.com/ndownloader/files/14241173)
Supplement: Supplementary file 4 [file 14241173]

Drum Set

Dr.

The image shows two staves of musical notation. The top staff is labeled 'Drum Set' and the bottom staff is labeled 'Dr.'. Both staves are in 4/4 time. The 'Drum Set' staff has a key signature of one sharp (F#) and a time signature of 4/4. The 'Dr.' staff has a key signature of one sharp (F#) and a time signature of 4/4. The 'Drum Set' staff contains a sequence of notes and rests, while the 'Dr.' staff contains a sequence of notes and rests, with a final measure containing a whole note rest.
