# Supplementary material
Source: publisher figshare collection journal article supplement (https://sage.figshare.com/ndownloader/files/14241173)
Supplement: Supplementary file 6 [file 14241173]

Drum Set

Dr.

3

The image shows two staves of musical notation. The top staff is labeled 'Drum Set' and the bottom staff is labeled 'Dr.'. Both staves are in 4/4 time, indicated by the '4' over and under the '4' in the key signature. The 'Drum Set' staff has a treble clef and a key signature of one sharp (F#). The 'Dr.' staff has a bass clef and a key signature of one sharp (F#). The 'Drum Set' staff contains four measures of music. The first measure has a quarter note on the middle line (F#4) and a quarter rest on the bottom line. The second measure has a quarter note on the middle line (F#4) and a quarter rest on the bottom line. The third measure has a quarter note on the middle line (F#4) and a quarter rest on the bottom line. The fourth measure has a quarter note on the middle line (F#4) and a quarter rest on the bottom line. The 'Dr.' staff contains four measures of music. The first measure has a quarter note on the middle line (F#4) and a quarter rest on the bottom line. The second measure has a quarter note on the middle line (F#4) and a quarter rest on the bottom line. The third measure has a quarter note on the middle line (F#4) and a quarter rest on the bottom line. The fourth measure has a quarter note on the middle line (F#4) and a quarter rest on the bottom line. Above the 'Drum Set' staff, there are four groups of beamed eighth notes, each with a bracket above it. The first group has four eighth notes (F#4, G#4, A#4, B4). The second group has four eighth notes (F#4, G#4, A#4, B4). The third group has four eighth notes (F#4, G#4, A#4, B4). The fourth group has four eighth notes (F#4, G#4, A#4, B4). Above the 'Dr.' staff, there are four groups of beamed eighth notes, each with a bracket above it. The first group has four eighth notes (F#4, G#4, A#4, B4). The second group has four eighth notes (F#4, G#4, A#4, B4). The third group has four eighth notes (F#4, G#4, A#4, B4). The fourth group has four eighth notes (F#4, G#4, A#4, B4). The number '3' is written above the first measure of the 'Dr.' staff.
