# Supplementary material
Source: publisher figshare collection journal article supplement (https://sage.figshare.com/ndownloader/files/14241173)
Supplement: Supplementary file 7 [file 14241173]

Drum Set

Musical notation for Drum Set in 4/4 time. The staff shows a sequence of eighth and sixteenth notes with 'x' marks above them, indicating specific drum hits. The notation includes a double bar line and a repeat sign.

Dr.

3

Musical notation for Dr. in 4/4 time. The staff shows a sequence of eighth and sixteenth notes with 'x' marks above them, indicating specific drum hits. The notation includes a double bar line and a repeat sign.
