# Supplementary material
Source: publisher figshare collection journal article supplement (https://sage.figshare.com/ndownloader/files/14241173)
Supplement: Supplementary file 8 [file 14241173]

Drum Set

Musical notation for Drum Set in 4/4 time. The staff shows a sequence of eighth and sixteenth notes with various articulations like accents and slurs.

Dr.

3

Musical notation for Dr. in 4/4 time. The staff shows a sequence of eighth and sixteenth notes with various articulations like accents and slurs. A '3' is written above the first measure.
