# Supplementary material
Source: publisher figshare collection journal article supplement (https://sage.figshare.com/ndownloader/files/14241173)
Supplement: Supplementary file 9 [file 14241173]

Drum Set

The musical notation is written on a five-line staff in 4/4 time. The key signature has one sharp (F#). The notation uses 'x' marks to represent snare drum hits and solid black notes to represent bass drum hits. The pattern is as follows:

- Measure 1: Snare on the first eighth note, followed by a triplet of snare hits on the next two eighth notes. The bass drum plays a quarter note on the first beat and a quarter note on the third beat.
- Measure 2: Snare on the first eighth note, followed by a triplet of snare hits on the next two eighth notes. The bass drum plays a quarter note on the first beat and a quarter note on the third beat.
- Measure 3: Snare on the first eighth note, followed by a triplet of snare hits on the next two eighth notes. The bass drum plays a quarter note on the first beat and a quarter note on the third beat.
- Measure 4: Snare on the first eighth note, followed by a triplet of snare hits on the next two eighth notes. The bass drum plays a quarter note on the first beat and a quarter note on the third beat.

The piece concludes with a double bar line at the end of the fourth measure.
