# Supplementary material
Source: publisher figshare collection journal article supplement (https://sage.figshare.com/ndownloader/files/14241173)
Supplement: Supplementary file 11 [file 14241173]

Drum Set

Dr.

3

This musical score is written for two parts: 'Drum Set' and 'Dr.' (Drums). Both parts are in 4/4 time, indicated by the '4' over the '4' in the time signature. The 'Drum Set' part uses a five-line staff with a double bar line at the beginning. The 'Dr.' part also uses a five-line staff with a double bar line at the beginning. The 'Drum Set' part features a complex rhythm with eighth and sixteenth notes, including a triplet of eighth notes in the third measure. The 'Dr.' part features a simpler rhythm with eighth and sixteenth notes, including a triplet of eighth notes in the first measure. Both parts end with a double bar line.
