# Supplementary material
Source: publisher figshare collection journal article supplement (https://sage.figshare.com/ndownloader/files/14241173)
Supplement: Supplementary file 13 [file 14241173]

Drum Set

The musical notation is written on a five-line staff. The time signature is 4/4, indicated by a '4' over a '4'. The key signature has one sharp (F#), indicated by a sharp symbol on the F line. The notation consists of four measures, each containing a series of 'x' marks representing drum hits. The first measure starts with a quarter rest, followed by a quarter note on the G line (snare), and then a series of eighth notes on the G line. The second measure starts with a quarter note on the G line, followed by a quarter note on the G line, and then a series of eighth notes on the G line. The third measure starts with a quarter note on the G line, followed by a quarter note on the G line, and then a series of eighth notes on the G line. The fourth measure starts with a quarter note on the G line, followed by a quarter note on the G line, and then a series of eighth notes on the G line. The notation ends with a double bar line.
