# Supplementary material
Source: publisher figshare collection journal article supplement (https://sage.figshare.com/ndownloader/files/14241173)
Supplement: Supplementary file 14 [file 14241173]

Drum Set

4/4

Dr.

4

4/4
