# Supplementary material
Source: publisher figshare collection journal article supplement (https://sage.figshare.com/ndownloader/files/14241173)
Supplement: Supplementary file 15 [file 14241173]

Drum Set

Dr.

4

This musical score is for a drum set and drums, written in 4/4 time. The Drum Set part (top staff) begins with a rest in the first measure, followed by a quarter note on the snare in the second measure, and then a series of eighth notes on the snare and cymbals in the third, fourth, fifth, and sixth measures. The Drums part (bottom staff) features a consistent pattern of eighth notes on the snare and cymbals throughout all six measures, with a final double bar line at the end.
