# Supplementary material
Source: publisher figshare collection journal article supplement (https://sage.figshare.com/ndownloader/files/14241173)
Supplement: Supplementary file 20 [file 14241173]

Drum Set

6/8

Drum Set notation in 6/8 time, consisting of 8 measures. The notation uses 'x' marks to indicate specific drum sounds: snare for the first and third notes, and cymbal for the second and fourth notes. The piece ends with a double bar line.
