# Supplementary material
Source: publisher figshare collection journal article supplement (https://sage.figshare.com/ndownloader/files/14241173)
Supplement: Supplementary file 21 [file 14241173]

Drum Set

Drum Set notation in 4/4 time. The staff consists of two lines. The top line has four groups of four eighth notes, each group beamed together and marked with an 'x' above it. The bottom line has four groups of two eighth notes, each group beamed together and marked with a 'z' below it. The notation is divided into four measures by vertical bar lines.

Dr.

3

Drum notation in 4/4 time. The staff consists of two lines. The top line has six groups of four eighth notes, each group beamed together and marked with an 'x' above it. The bottom line has six groups of two eighth notes, each group beamed together and marked with a 'z' below it. The notation is divided into four measures by vertical bar lines. A double bar line is at the end of the fourth measure.
