# Supplementary material
Source: publisher figshare collection journal article supplement (https://sage.figshare.com/ndownloader/files/14241173)

Drum Set

Dr. 

Supplement: Supplementary file 12 [file 14241173]
